# Supplementary material for: Sex-Specific Associations between Serum Ferritin and Osteosarcopenic Obesity in Adults Aged over 50 Years
Source: MDPI journal article supplement (doi:10.3390/nu14194023), 2022-09-28
Supplement: s1 [file s1]

**Supplementary Table 1.** Baseline characteristics of women according to tertiles of serum ferritin level.

| Characteristics                            | Total          | Tertiles (T) of serum ferritin |                |                | <i>p</i> for trend |
|--------------------------------------------|----------------|--------------------------------|----------------|----------------|--------------------|
|                                            |                | T1                             | T2             | T3             |                    |
| No. of subjects (n)                        | 16,912         | 5,636                          | 5,637          | 5,639          |                    |
| Age (years)                                | 58.28 (6.44)   | 58.85 (6.62)                   | 58.68 (6.32)   | 59.31 (6.12)   | <0.0001            |
| Height (cm)                                | 156.63 (5.25)  | 157.00 (5.28)                  | 156.55 (5.20)  | 156.32 (5.25)  | <0.0001            |
| Weight (kg)                                | 56.98 (7.87)   | 56.46(7.81)                    | 56.60 (7.48)   | 57.89 (8.21)   | <0.0001            |
| BMI (kg/m <sup>2</sup> )                   | 23.23 (3.04)   | 22.91 (3.00)                   | 23.09 (2.88)   | 23.69 (3.17)   | <0.0001            |
| Fat mass (kg)                              | 18.98 (5.52)   | 18.31 (5.48)                   | 18.78 (5.27)   | 19.84 (5.69)   | <0.0001            |
| Percent body fat (%)                       | 32.78 (5.87)   | 31.90 (5.99)                   | 32.70 (5.72)   | 33.74 (5.75)   | <0.0001            |
| ASM (kg)                                   | 15.19 (1.97)   | 15.26 (2.00)                   | 15.09 (1.91)   | 15.21 (1.99)   | 0.158              |
| SMI <sup>a</sup> (kg/m <sup>2</sup> )      | 6.17 (0.58)    | 6.17 (0.58)                    | 6.14 (0.55)    | 6.20 (0.60)    | 0.002              |
| Current smoker (%)                         | 1.7            | 1.4                            | 1.6            | 2.1            | 0.010              |
| Heavy drinking <sup>b</sup> (%)            | 3.2            | 2.6                            | 3.0            | 4.0            | <0.0001            |
| Regular physical activity <sup>c</sup> (%) | 21.8           | 22.5                           | 22.5           | 20.5           | 0.011              |
| Comorbidities                              |                |                                |                |                |                    |
| Hypertension (%)                           | 21.1           | 18.8                           | 21.6           | 22.8           | <0.0001            |
| Diabetes (%)                               | 6.4            | 7.2                            | 6.0            | 5.9            | 0.003              |
| Dyslipidemia (%)                           | 29.7           | 26.1                           | 30.1           | 33.0           | <0.0001            |
| Laboratory findings                        |                |                                |                |                |                    |
| Ferritin (ng/mL)                           | 111.38 (76.55) | 45.68 (20.23)                  | 98.40 (14.38)  | 190.01 (79.35) | <0.0001            |
| Iron (ug/dL)                               | 104.25 (33.92) | 101.55 (38.69)                 | 106.26 (30.39) | 105.14 (31.57) | <0.0001            |
| TIBC (ug/dL)                               | 307.96 (42.08) | 326.44 (47.17)                 | 300.18 (34.14) | 296.17 (36.43) | <0.0001            |
| Total cholesterol (mg/dL)                  | 205.18 (37.38) | 202.76 (36.45)                 | 205.23 (36.33) | 207.55 (39.15) | <0.0001            |
| LDL (mg/dL)                                | 134.36 (35.72) | 130.74 (34.42)                 | 134.00 (34.71) | 138.34 (37.55) | <0.0001            |
| HDL (mg/dL)                                | 63.84 (16.34)  | 65.23 (16.48)                  | 64.46 (16.23)  | 61.83 (16.12)  | <0.0001            |
| Triglycerides (mg/dL)                      | 103.98 (58.82) | 99.78 (52.36)                  | 101.32 (53.15) | 110.84 (68.87) | <0.0001            |
| Fasting glucose (mg/dL)                    | 97.40 (15.59)  | 96.28 (14.06)                  | 96.67 (14.47)  | 99.24 (17.80)  | <0.0001            |
| HbA1c (%)                                  | 5.75 (0.58)    | 5.72 (0.53)                    | 5.73 (0.50)    | 5.81 (0.68)    | <0.0001            |
| Creatinine (mg/dL)                         | 0.69 (0.15)    | 0.68 (0.11)                    | 0.69 (0.11)    | 0.70 (0.20)    | <0.0001            |
| Albumin (g/dL)                             | 4.58 (0.25)    | 4.53 (0.24)                    | 4.58 (0.24)    | 4.63 (0.25)    | <0.0001            |
| AST (IU/L)                                 | 24.21 (10.75)  | 22.26 (7.86)                   | 23.72 (8.69)   | 26.64 (14.11)  | <0.0001            |
| ALT (IU/L)                                 | 21.59 (13.42)  | 18.84 (9.16)                   | 20.75 (10.89)  | 25.17 (17.80)  | <0.0001            |

Values are presented as mean (standard deviation) or percentage.

<sup>a</sup> SMI=ASM/height(m<sup>2</sup>).

<sup>b</sup> ≥20g/day.

<sup>c</sup> Moderate physical activity≥5/week or vigorous physical activity≥3/week

ALT: alanine aminotransferase; ASM: appendicular skeletal muscle mass; AST: aspartate aminotransferase; HDL: high density lipoprotein cholesterol; LDL: low density lipoprotein cholesterol; SMI: skeletal muscle mass index.

Serum ferritin tertile (T) levels for women: T1 (<74.50), T2 (≥74.5, <125.0), and T3 (≥125.00).

**Supplementary Table 2.** Baseline characteristics of men according to tertiles of serum ferritin level.

| Characteristics                            | Total           | Tertiles (T) of serum ferritin |                |                 | <i>p</i> for trend |
|--------------------------------------------|-----------------|--------------------------------|----------------|-----------------|--------------------|
|                                            |                 | T1                             | T2             | T3              |                    |
| No. of Subjects (n)                        | 8,634           | 2,878                          | 2,878          | 2,878           |                    |
| Age (years)                                | 59.64 (6.76)    | 60.66 (7.14)                   | 59.39 (6.58)   | 58.88 (6.40)    | <0.0001            |
| Height (cm)                                | 168.94 (5.54)   | 168.33 (5.54)                  | 169.09 (5.52)  | 169.42 (5.51)   | <0.0001            |
| Weight (kg)                                | 69.35 (9.07)    | 67.55 (8.77)                   | 68.96 (8.73)   | 71.54 (9.23)    | <0.0001            |
| BMI (kg/m <sup>2</sup> )                   | 24.27 (2.72)    | 23.82 (2.72)                   | 24.09 (2.63)   | 24.89 (2.72)    | <0.0001            |
| Fat mass (kg)                              | 16.78 (5.19)    | 15.78 (5.10)                   | 16.48 (5.01)   | 18.08 (5.18)    | <0.0001            |
| Percent body fat (%)                       | 23.83 (5.16)    | 22.98 (5.36)                   | 23.57 (4.99)   | 24.93 (4.91)    | <0.0001            |
| ASM (kg)                                   | 22.33 (4.74)    | 21.95 (2.66)                   | 22.26 (2.64)   | 22.77 (7.28)    | <0.0001            |
| SMI <sup>a</sup> (kg/m <sup>2</sup> )      | 7.80 (1.53)     | 7.72 (0.64)                    | 7.76 (0.62)    | 7.91 (2.50)     | <0.0001            |
| Current smoker (%)                         | 25.9            | 23.6                           | 26.2           | 28.0            | <0.0001            |
| Heavy drinking <sup>b</sup> (%)            | 39.5            | 31.4                           | 39.6           | 47.0            | <0.0001            |
| Regular physical activity <sup>c</sup> (%) | 26.4            | 28.1                           | 26.7           | 24.3            | 0.001              |
| Comorbidities                              |                 |                                |                |                 |                    |
| Hypertension (%)                           | 32.2            | 32.4                           | 29.9           | 34.3            | 0.121              |
| Diabetes (%)                               | 13.1            | 16.3                           | 11.6           | 11.4            | <0.0001            |
| Dyslipidemia (%)                           | 30.1            | 27.5                           | 30.0           | 32.8            | <0.0001            |
| Laboratory findings                        |                 |                                |                |                 |                    |
| Ferritin (ng/mL)                           | 228.19 (154.56) | 102.69 (36.24)                 | 197.11 (26.84) | 384.77 (168.54) | <0.0001            |
| Iron (ug/dL)                               | 126.02 (39.85)  | 124.53 (40.07)                 | 126.17 (38.45) | 127.15 (40.90)  | 0.191              |
| TIBC (ug/dL)                               | 302.72 (40.26)  | 312.22 (43.68)                 | 299.73 (37.15) | 197.32 (38.52)  | <0.0001            |
| Total cholesterol (mg/dL)                  | 287.98 (36.63)  | 187.89 (36.63)                 | 194.08 (36.48) | 195.53 (38.78)  | <0.0001            |
| LDL (mg/dL)                                | 127.39 (34.86)  | 123.21 (34.02)                 | 128.86 (34.02) | 130.09 (36.14)  | <0.0001            |
| HDL (mg/dL)                                | 53.90 (14.53)   | 54.88 (14.57)                  | 54.43 (14.56)  | 52.39 (14.34)   | <0.0001            |
| Triglycerides (mg/dL)                      | 125.11 (78.67)  | 112.70 (61.69)                 | 121.63 (76.06) | 141.00 (92.53)  | <0.0001            |
| Fasting glucose (mg/dL)                    | 102.85 (19.44)  | 101.45 (18.53)                 | 101.77 (18.11) | 105.32 (21.29)  | <0.0001            |
| HbA1c (%)                                  | 5.85 (0.73)     | 5.86 (0.72)                    | 5.81 (0.69)    | 5.87 (0.78)     | 0.378              |
| Creatinine (mg/dL)                         | 0.95 (0.23)     | 0.95 (0.24)                    | 0.95 (0.19)    | 0.95 (0.26)     | 0.964              |
| Albumin (g/dL)                             | 4.64 (0.25)     | 4.59 (0.24)                    | 4.65 (0.26)    | 4.68 (0.26)     | <0.0001            |
| AST (IU/L)                                 | 27.15 (14.93)   | 24.58 (8.96)                   | 26.02 (11.61)  | 30.85 (20.80)   | <0.0001            |
| ALT (IU/L)                                 | 27.94 (17.15)   | 23.71 (11.47)                  | 26.54 (14.26)  | 33.56 (22.28)   | <0.0001            |

Values are presented as mean (standard deviation) or percentage.

<sup>a</sup> SMI=ASM/height (m<sup>2</sup>).

<sup>b</sup> ≥20g/day.

<sup>c</sup> Moderate physical activity≥5/week or vigorous physical activity≥3/week

ALT: alanine aminotransferase; ASM: appendicular skeletal muscle mass; AST: aspartate aminotransferase; HDL: high density lipoprotein cholesterol; LDL: low density lipoprotein cholesterol; SMI: skeletal muscle mass index.

Serum ferritin tertile (T) levels for men: T1 (<153.5), T2 (≥153.5, <248.0), and T3 (≥248.0).

**Supplementary Table 3.** Prevalence of multiple adverse body composition according to ferritin group according to cut-off value in women and men.

| Number of adverse body composition | Serum ferritin level (ng/ml) |                          |                  | p for trend |
|------------------------------------|------------------------------|--------------------------|------------------|-------------|
|                                    | Low (<40ng/ml)               | Normal (40 to 200 ng/ml) | High (200ng/mL<) |             |
| Women (n = 16,912)                 | N = 2,032                    | N = 13,225               | N = 1,655        | <0.0001     |
| 0 (%)                              | 49.1                         | 30.0                     | 22.8             |             |
| 1 (%)                              | 37.8                         | 45.9                     | 49.3             |             |
| 2 (%)                              | 12.0                         | 21.9                     | 25.2             |             |
| 3 (=OSO) (%)                       | 1.1                          | 2.2                      | 2.6              |             |
| Men (n = 8,634)                    | N = 214                      | N = 4,239                | N = 4,181        | 0.419       |
| 0 (%)                              | 29.7                         | 36.4                     | 32.5             |             |
| 1 (%)                              | 45.8                         | 42.0                     | 46.7             |             |
| 2 (%)                              | 18.9                         | 18.7                     | 17.7             |             |
| 3 (= OSO) (%)                      | 5.7                          | 3.0                      | 3.1              |             |

Abbreviations: OSO, osteosarcopenic obesity.

**Supplementary Table 4.** Multivariate logistic regression analysis for association of ferritin group according to cut-off value with multiple adverse body composition in women and men.

| Adverse body composition <sup>a</sup> | Crude            | Adjusted OR <sup>b</sup> |
|---------------------------------------|------------------|--------------------------|
|                                       | OR (95% CI)      | OR (95% CI)              |
| <b>Women (n = 16,912)</b>             |                  |                          |
| 1 (vs 0)                              |                  |                          |
| Low ferritin group                    | 1 (ref.)         | 1 (ref.)                 |
| Normal ferritin group                 | 1.98 (1.79-2.19) | 1.48 (1.31-1.68)         |
| High ferritin group                   | 2.80 (2.39-3.26) | 1.56 (1.28-1.90)         |
| 2 (vs 0)                              |                  |                          |
| Low                                   | 1 (ref.)         | 1 (ref.)                 |
| Normal                                | 2.99 (2.57-3.47) | 1.95 (1.61-2.37)         |
| High                                  | 4.51 (3.70-5.51) | 2.01 (1.55-2.61)         |
| 3 (=OSO) (vs 0)                       |                  |                          |
| Low                                   | 1 (ref.)         | 1 (ref.)                 |
| Normal                                | 3.17 (2.06-4.87) | 2.00 (1.16-3.45)         |
| High                                  | 4.92 (2.92-8.28) | 2.35 (1.22-4.51)         |
| <b>Men (n = 8,634)</b>                |                  |                          |
| 1 (vs 0)                              |                  |                          |
| Low                                   | 1 (ref.)         | 1 (ref.)                 |
| Normal                                | 0.75 (0.54-1.03) | 0.74 (0.51-1.06)         |
| High                                  | 0.93 (0.67-1.29) | 0.86 (0.60-1.24)         |
| 2 (vs 0)                              |                  |                          |
| Low                                   | 1 (ref.)         | 1 (ref.)                 |
| Normal                                | 0.80 (0.53-1.21) | 0.87 (0.54-1.38)         |
| High                                  | 0.85 (0.57-1.28) | 0.95 (0.59-1.51)         |
| 3 (=OSO) (vs 0)                       |                  |                          |
| Low                                   | 1 (ref.)         | 1 (ref.)                 |
| Normal                                | 0.43 (0.22-0.82) | 0.47 (0.22-1.00)         |
| High                                  | 0.50 (0.26-0.96) | 0.65 (0.30-1.39)         |

Abbreviations: ALT: alanine aminotransferase; CI: confidence interval; LDL: low-density lipoprotein cholesterol; OR: odds ratio; OSO: osteosarcopenic obesity.

<sup>a</sup>Number of osteoporosis/osteopenia, muscle mass loss, and obesity.

<sup>b</sup>Adjusted for age, hypertension, fasting glucose, heavy drinker, smoking status, LDL, ALT, serum creatinine, and regular physical activity.

Low serum ferritin level: <40ng/ml

Normal serum ferritin level: 40 to 200ng/ml

High serum ferritin level: 200ng/ml<
